# Supplementary material for: Clinical outcome of breast cancer in carriers of BRCA1 and BRCA2 mutations according to molecular subtypes
Source: PubMed Central journal article supplement (PMC7184602; doi:10.1038/s41598-020-63759-1), 2020-04-27

# **Clinical outcome of breast cancer in carriers of *BRCA1* and *BRCA2* mutations according to molecular subtypes**

Solene De Talhouet<sup>1</sup>, Julien Peron<sup>2,3,4</sup>, Aurelie Vuilleumier<sup>5</sup>, Alex Friedlaender<sup>5</sup>, Valeria Viassolo<sup>5</sup>, Aurélie Ayme<sup>6</sup>, Alexandre Bodmer<sup>5</sup>, Isabelle Treilleux<sup>7</sup>, Noemie Lang<sup>5</sup>, Jean-Christophe Tille<sup>8</sup>, Pierre O. Chappuis<sup>5,6</sup>, Adrien Buisson<sup>7</sup>, Sophie Giraud<sup>9</sup>, Christine Lasset<sup>10</sup>, Valerie Bonadona<sup>10</sup>, Olivier Tredan<sup>1</sup>, S. Intidhar Labidi-Galy<sup>5, 11</sup>

## **Supplementary materials**

**Supplementary Table S1: List of *BRCA1* and *BRCA2* mutations**

**Supplementary Table S2: Patients characteristics in the triple-negative breast cancers (TNBC) cohort.** NA: not-available. \*\*\* Positive nodes if pre-chemotherapy biopsy positive or there was at least one yN or scar in the removed node after neoadjuvant chemotherapy.

**Supplementary Table S3: Patients characteristics in the non-TNBC cohort.**

**Supplementary Table S4: Landmark analysis at one year of the impact of *BRCA* status on DFS and DSS in the TNBC cohort**

**Supplementary Table S5: Multivariate analysis of DFS and DSS in the subgroup of patients with non-TNBC.** NI: not-included.

**Supplementary Figure S1: Flow diagram for selection of patients in the Swiss and French cohorts.**

**Supplementary Table S1: List of BRCA1 and BRCA2 mutations**

| <b>BRCA gene</b> | <b>cDNA</b>                      | <b>protein</b>             |
|------------------|----------------------------------|----------------------------|
| 1                | c.2612_2613delinsTTT             | p.(Pro871Leufs*32)         |
| 1                | c.3143del                        | p.(Gly1048Valfs*14)        |
| 1                | c.5266dup                        | p.(Gln1756Profs*74)        |
| 1                | c.5106del                        | p.(Lys1702Asnfs*4)         |
| 1                | c.4065_4068del                   | p.(Asn1355Lysfs*10)        |
| 1                | c.1660G>T                        | p.(Glu554*)                |
| 1                | c.220C>T                         | p.(Gln74*)                 |
| 1                | c.(80+1_81-1)_(4986+1_4987-1)del | p.?                        |
| 1                | c.5128G>T                        | p.(Gly1710*)               |
| 1                | c.2211dup                        | p.(Val738Serfs*2)          |
| 1                | c.3477_3480del                   | p.(Ile1159Metfs*50)        |
| 1                | c.4569_4573delinsT               | p.(Ser1524Lysfs*23)        |
| 1                | c.68_69del                       | p.(Glu23Valfs*17)          |
| 1                | c.3331_3334del                   | p.(Gln1111Asnfs*5)         |
| 1                | c.3481_3491del                   | p.(Glu1161Phefs*3)         |
| 1                | c.3770_3771del                   | p.(Glu1257Glyfs*9)         |
| 1                | c.798_799del                     | p.(Ser267Lysfs*19)         |
| 1                | c.191G>A                         | p.(Cys64Tyr)               |
| 1                | c.3481_3491del                   | p.(Glu1161Phefs*3)         |
| 1                | c.[4281_4282insT; 4244_4281dup]  | p.(Ser1428*)               |
| 1                | c.134+3A>C                       | p.Cys27*                   |
| 1                | c.191G>A                         | p.(Cys64Tyr)               |
| 1                | c.1480C>T                        | p.(Gln494*)                |
| 1                | c.4016_4017insTT                 | p.(Glu1339Aspfs*28)        |
| 1                | c.5123C>A                        | p.(Ala1708Glu)             |
| 1                | c.5106delA                       | p.(Lys1702Asnfs*4)         |
| 1                | c.5266dup                        | p.(Gln1756Profs*74)        |
| 1                | c.4258C>T                        | p.(Gln1420*)               |
| 1                | c.2217dup                        | p.(Val740Serfs*3)          |
| 1                | c.4372C>T                        | p.(Gln1458*)               |
| 1                | c.5080G>T                        | p.Asp1692_Trp1718delinsGly |
| 1                | c.5266dup                        | p.(Gln1756Profs*74)        |
| 1                | c.5106del                        | p.(Lys1702Asnfs*4)         |
| 1                | c.2603C>G                        | p.(Ser868*)                |
| 1                | c.3756_3759del                   | p.(Ser1253Argfs*10)        |
| 1                | c.4810C>T                        | p.(Gln1604*)               |
| 1                | c.4391del                        | p.(Pro1464Leufs*2)         |
| 1                | c.3331_3334del                   | p.(Gln1111Asnfs*5)         |
| 1                | c.4391del                        | p.(Pro1464Leufs*2)         |
| 1                | c.212+1G>A                       | p.Cys64*                   |
| 1                | c.3282T>G                        | p.(Tyr1094*)               |
| 1                | c.3937C>T                        | p.(Gln1313*)               |

|   |                                      |                                        |
|---|--------------------------------------|----------------------------------------|
| 1 | c.4569_4573delinsT                   | p.(Ser1524Lysfs*23)                    |
| 1 | c.3937C>T                            | p.(Gln1313*)                           |
| 1 | c.1115G>A                            | p.(Trp372*)                            |
| 1 | c.4065_4068del                       | p.(Asn1355Lysfs*10)                    |
| 1 | c.1961del                            | p.(Lys654Serfs*47)                     |
| 1 | c.2750del                            | p.(Ile917Thrfs*83)                     |
| 1 | c.3841C>T                            | p.(Gln1281*)                           |
| 1 | c.3770_3771del                       | p.(Glu1257Glyfs*9)                     |
| 1 | c.[4281_4282insT; 4244_4281dup]      | p.(Ser1428*)                           |
| 1 | c.5194-2A>G                          | p.[His1732_Lys1759del,His1732Serfs*29] |
| 1 | c.1687C>T                            | p.(Gln563*)                            |
| 1 | c.5251C>T                            | p.(Arg1751*)                           |
| 1 | c.2524dup                            | p.(Glu842Glyfs*10)                     |
| 1 | c.2603C>G                            | p.(Ser868*)                            |
| 1 | c.1687C>T                            | p.(Gln563*)                            |
| 1 | c.5266dup                            | p.(Gln1756Profs*74)                    |
| 1 | c.4065_4068del                       | p.(Asn1355Lysfs*10)                    |
| 1 | c.(5332+?_5333-?)_(5406+?_5407-?)del | p.(Asp1778Glyfs*27)                    |
| 1 | c.5361_5362del                       | p.(Cys1787Trpfs*42)                    |
| 1 | c.3841C>T                            | p.(Gln1281*)                           |
| 1 | c.1979_1982del                       | p.(Val660Glyfs*40)                     |
| 1 | c.181T>G                             | p.(Cys61Gly                            |
| 1 | c.(441+?_442-?)_(4357+?_4358-?)del   | p.(Glu149Tyrfs*2)                      |
| 1 | c.5030_5033del                       | p.(Thr1677Ilefs*2)                     |
| 1 | c.815_824dup                         | p.(Thr276Alafs*14)                     |
| 1 | c.5266dup                            | p.(Gln1756Profs*74)                    |
| 1 | c.(441+?_442-?)_(4357+?_4358-?)del   | p.(Glu149Tyrfs*2)                      |
| 1 | c.4391delC                           | p.(Pro1464Leufs*2)                     |
| 1 | c.3937C>T                            | p.(Gln1313*)                           |
| 1 | c.3481_3491del                       | p.(Glu1161Phefs*3)                     |
| 1 | c.3770_3771del                       | p.(Glu1257Glyfs*9)                     |
| 1 | c.3481_3491del                       | p.(Glu1161Phefs*3)                     |
| 1 | c.134+3A>C                           | p.Cys27*                               |
| 1 | c.191G>A                             | p.(Cys64Tyr)                           |
| 1 | c.4183C>T                            | p.Gln1395*                             |
| 1 | c.3481_3491del                       | p.(Glu1161Phefs*3)                     |
| 1 | c.843_846del                         | p.(Ser282Tyrfs*15)                     |
| 1 | c.3770_3771del                       | p.(Glu1257Glyfs*9)                     |
| 1 | c.5266dup                            | p.(Gln1756Profs*74)                    |
| 1 | c.3839_3843delinsAGGC                | p.(Ser1280*)                           |
| 1 | c.5266dup                            | p.(Gln1756Profs*74)                    |
| 1 | c.843_846del                         | p.(Ser282Tyrfs*15)                     |
| 1 | c.1292T>G                            | p.(Leu431*)                            |
| 1 | c.3756_3759del                       | p.(Ser1253Argfs*10)                    |
| 1 | c.5266dup                            | p.(Gln1756Profs*74)                    |

|   |                                      |                                    |
|---|--------------------------------------|------------------------------------|
| 1 | c.3839_3843delinsAGGC                | p.(Ser1280*)                       |
| 1 | c.212+3A>G                           | p.Cys64*                           |
| 1 | c.3756_3759del                       | p.(Ser1253Argfs*10)                |
| 1 | c.5074+1G>A                          | p.[Asp1692Glyfs*14,Val1665Serfs*8] |
| 1 | c.2092del                            | p.(Leu698Tyrfs*32)                 |
| 1 | c.181T>G                             | p.Cyst61Gly                        |
| 1 | c.4065_4068del                       | p.(Asn1355Lysfs*10)                |
| 1 | c.1961del                            | p.(Lys654Serfs*47)                 |
| 1 | c.68_69del                           | p.(Glu23Valfs*17)                  |
| 1 | c.5537_5556del                       | p.(Gln1846Leufs*27)                |
| 1 | c.3756_3759del                       | p.(Ser1253Argfs*10)                |
| 1 | c.4065_4068del                       | p.(Asn1355Lysfs*10)                |
| 1 | c.(4484+1_4485-1)_(4675+1_4676-1)del | p.(Ser1496Glyfs*14)                |
| 1 | c.3381T>G                            | p.(Tyr1127*)                       |
| 1 | c.1121del                            | p.(Thr374Asnfs*2)                  |
| 1 | c.4222C>T                            | p.Gln1408*                         |
| 1 | c.19_47del                           | p.(Arg7Cysfs*24)                   |
| 1 | c.815_824dup                         | p.(Thr276Alafs*14)                 |
| 1 | c.2066_2069del                       | p.(Ser689Lysfs*11)                 |
| 1 | c.2612delinsTT                       | p.(Pro871Leufs*32)                 |
| 1 | c.1729_1730del                       | p.(Glu577Ilefs*8)                  |
| 1 | c.213-2A>C                           | p.Arg71Serfs*10                    |
| 1 | c.2138C>G                            | p.(Ser713*)                        |
| 1 | c.212+3A>G                           | p.Cys64*                           |
| 1 | c.5123C>A                            | p.(Ala1708Glu)                     |
| 1 | c.5035_5039del                       | p.(Leu1679Tyrfs*2)                 |
| 1 | c.3756_3759del                       | p.(Ser1253Argfs*10)                |
| 1 | c.1121del                            | p.(Thr374Asnfs*2)                  |
| 1 | c.4216A>T                            | p.(Lys1406*)                       |
| 1 | c.1A>G                               | p.(Met1?)                          |
| 1 | c.4675G>A                            | p.Gln1556Glyfs*14                  |
| 1 | c.5296del                            | p.(Ile1766Serfs*27)                |
| 1 | c.5080G>T                            | p.Asp1692_Trp1718delinsGly         |
| 1 | c.1965C>A                            | p.(Tyr655*)                        |
| 1 | c.4183C>T                            | p.(Gln1395*)                       |
| 1 | c.140G>T                             | p.(Cys47Phe)                       |
| 1 | c.5537_5556del                       | p.(Gln1846Leufs*27)                |
| 1 | c.5266dup                            | p.(Gln1756Profs*74)                |
| 1 | c.3700_3704del                       | p.(Val1234Glnfs*8)                 |
| 1 | c.5177_5180del                       | p.(Arg1726Lysfs*3)                 |
| 1 | c.5123C>A                            | p.(Ala1708Glu)                     |
| 1 | c.34C>T                              | p.(Gln12*)                         |
| 1 | c.68_69del                           | p.(Glu23Valfs*17)                  |
| 1 | c.3756_3759del                       | p.(Ser1253Argfs*10)                |
| 1 | c.1961del                            | p.(Lys654Serfs*47)                 |

|   |                                      |                            |
|---|--------------------------------------|----------------------------|
| 1 | c.2217dup                            | p.(Val740Serfs*3)          |
| 1 | c.5266dup                            | p.(Gln1756Profs*74)        |
| 1 | c.(5074+1_5075-1)_(5277+1_5278-1)dup | p.?                        |
| 1 | c.220C>T                             | p.(Gln74*)                 |
| 1 | c.5289del                            | p.(Leu1764*)               |
| 1 | c.5266dup                            | p.(Gln1756Profs*74)        |
| 1 | c.5072C>A                            | p.(Thr1691Lys)             |
| 1 | c.5213 G>T                           | p.(Gly1738Val)             |
| 1 | c.4161_4162del                       | p.(Gln1388Glufs*2)         |
| 1 | c.1513A>T                            | p.(Lys505*)                |
| 1 | c.140G>T                             | p.(Cys47Phe)               |
| 1 | c.3013del                            | p.(Glu1005Asnfs*19)        |
| 1 | c.1505_1508del                       | p.(Leu502Cysfs*29)         |
| 1 | c.(4185+1_4186-1)_(4357+1_4358-1)dup | p.?                        |
| 1 | c.5266dup                            | p.(Gln1756Profs*74)        |
| 1 | c.188T>A                             | p.(Leu63*)                 |
| 1 | c.5266dup                            | p.(Gln1756Profs*74)        |
| 1 | c.211A>G                             | p.[Cys64*;Phe46_Arg71Gly]  |
| 1 | c.5080G>T                            | p.Asp1692_Trp1718delinsGly |
| 1 | c.68_69del                           | p.(Glu23Valfs*17)          |
| 1 | c.5089T>C                            | p.(Cys1697Arg)             |
| 1 | c.3481_3491del                       | p.(Glu1161Phefs*3)         |
| 1 | c.2612_2613insT                      | p.(Phe872Valfs*31)         |
| 1 | c.3481_3491del                       | p.(Glu1161Phefs*3)         |
| 1 | c.66dup                              | p.(Glu23Argfs*18)          |
| 1 | c.5080G>T                            | p.Asp1692_Trp1718delinsGly |
| 1 | c.4327C>T                            | p.(Arg1443*)               |
| 1 | c.(5332+1_5333-1_5406+1_5407-1)del   | p.?                        |
| 1 | c.815_824dup                         | p.(Thr276Alafs*14)         |
| 1 | c.5266dup                            | p.(Gln1756Profs*74)        |
| 1 | c.5080G>T                            | p.Asp1692_Trp1718delinsGly |
| 1 | c.68_69del                           | p.(Glu23Valfs*17)          |
| 1 | c.2679_2682del                       | p.(Lys893Asnfs*106)        |
| 1 | c.2068A>T                            | p.(Lys690*)                |
| 1 | c.(80+1_81-1)_(441+1_442-1)dup       | p.?                        |
| 1 | c.4185G>A                            | p.Gly1366Alafs*8           |
| 1 | c.3841C>T                            | p.(Gln1281*)               |
| 1 | c.367del                             | p.(Ser123Leufs*40)         |
| 1 | c.68_69del                           | p.(Glu23Valfs*17)          |
| 1 | c.5419del                            | p.(Ile1807Leufs*27)        |
| 2 | c.145G>T                             | p.(Glu49*)                 |
| 2 | c.8639_8640del                       | p.(Thr2880Asnfs*26)        |
| 2 | c.8364G>A                            | p.(Trp2788*)               |
| 2 | c.6079dup                            | p.(Arg2027Lysfs*22)        |
| 2 | c.8485C>T                            | p.(Gln2829*)               |

|   |                                      |                     |
|---|--------------------------------------|---------------------|
| 2 | c.8219T>G                            | p.(Leu2740*)        |
| 2 | c.6447_6448dup                       | p.(Lys2150Ilefs*19) |
| 2 | c.658_659del                         | p.(Val220Ilefs*4)   |
| 2 | c.771_775del                         | p.(Asn257Lysfs*17)  |
| 2 | c.7680dup                            | p.(Gln2561Serfs*5)  |
| 2 | c.1813dupA                           | p.(Ile605Asnfs*11)  |
| 2 | c.3303_3336dup                       | p.(Glu1113*)        |
| 2 | c.1929del                            | p.(Arg645Glufs*15)  |
| 2 | c.1981_1984dup                       | p.(Ser662*)         |
| 2 | c.6591_6592del                       | p.(Glu2198Asnfs*4)  |
| 2 | c.9253dup                            | p.(Thr3085Asnfs*26) |
| 2 | c.1813dup                            | p.(Ile605Asnfs*11)  |
| 2 | c.(8331+1_8332-1)_(8632+1_8633-1)del | p.?                 |
| 2 | c.5984dup                            | p.(Asn1995Lysfs*8)  |
| 2 | c.4037_4038del                       | p.(Thr1346Serfs*5)  |
| 2 | c.6626_6627del                       | p.(Ile2209Argfs*15) |
| 2 | c.8364G>A                            | p.(Trp2788*)        |
| 2 | c.9672dup                            | p.(Tyr3225Ilefs*30) |
| 2 | c.2133C>A                            | p.(Cys711*)         |
| 2 | c.5217_5220del                       | p.(Tyr1739*)        |
| 2 | c.6509_6510del                       | p.(Lys2170Serfs*5)  |
| 2 | c.6408_6414del                       | p.(Asn2137Lysfs*29) |
| 2 | c.272delinsTT                        | p.(Tyr91Phefs*10)   |
| 2 | c.9403del                            | p.(Leu3135Phefs*28) |
| 2 | c.3847_3848del                       | p.(Val1283Lysfs*2)  |
| 2 | c.9294C>A                            | p.(Tyr3098*)        |
| 2 | c.9097del                            | p.(Thr3033Leufs*29) |
| 2 | c.[3637delG;3641T>G]                 | p.(Glu1213Lysfs*15) |
| 2 | c.9294C>A                            | p.(Tyr3098*)        |
| 2 | c.2092del                            | p.(Leu698Tyrfs*32)  |
| 2 | c.771_775del                         | p.(Asn257Lysfs*17)  |
| 2 | c.7654dup                            | p.(Ile2552Asnfs*2)  |
| 2 | c.9501+3A>T                          | p.Gly3086Glufs*3    |
| 2 | c.5722_5723del                       | p.(Leu1908Argfs*2)  |
| 2 | c.5946del                            | p.(Ser1982Argfs*22) |
| 2 | c.1310_1313del                       | p.(Lys437Ilefs*22)  |
| 2 | c.755_758del                         | p.(Asp252Valfs*24)  |
| 2 | c.2701del                            | p.(Ala902Leufs*2)   |
| 2 | c.5609_5610delinsAG                  | p.(Phe1870*)        |
| 2 | c.2548C>T                            | p.(Gln850*)         |
| 2 | c.3195_3198del                       | p.(Asn1066Leufs*10) |
| 2 | c.2612C>A                            | p.(Ser871*)         |
| 2 | c.6626_6627delTA                     | p.(Ile2209Argfs*15) |
| 2 | c.5157_5161del                       | p.(Asn1719Lysfs*6)  |
| 2 | c.3847_3848del                       | p.(Val1283Lysfs*2)  |

|   |                                |                     |
|---|--------------------------------|---------------------|
| 2 | c.9061G>T                      | p.(Glu3021*)        |
| 2 | c.5946del                      | p.(Ser1982Argfs*22) |
| 2 | c.5566_5584del                 | p.(His1856*)        |
| 2 | c.9097del                      | p.(Thr3033Leufs*29) |
| 2 | c.9294C>A                      | p.(Tyr3098*)        |
| 2 | c.9294C>A                      | p.(Tyr3098*)        |
| 2 | c.8537_8538del                 | p.(Glu2846Glyfs*22) |
| 2 | c.658_659del                   | p.(Val220Ilefs*4)   |
| 2 | c.1310_1313del                 | p.(Lys437Ilefs*22)  |
| 2 | c.771_775del                   | p.(Asn257Lysfs*17)  |
| 2 | c.1813dup                      | p.(Ile605Asnfs*11)  |
| 2 | c.1212del                      | p.(Asn404Lysfs*26)  |
| 2 | c.736_755del                   | p.(Phe246Glnfs*2)   |
| 2 | c.6833_6837del                 | p.(Ile2278Serfs*13) |
| 2 | c.9294C>A                      | p.(Tyr3098*)        |
| 2 | c.7007G>C                      | p.Gly2281Alafs*31   |
| 2 | c.7436-2A>T                    | p.Asp2479Valfs*41   |
| 2 | c.5482_5486del                 | p.(Lys1828Valfs*4)  |
| 2 | c.(67+1_68-1)_(316+1_317-1)del | p.?                 |
| 2 | c.5645C>A                      | p.(Ser1882*)        |
| 2 | c.5439dup                      | p.(Val1814Cysfs*3)  |
| 2 | c.1832C>A                      | p.(Ser611*)         |
| 2 | c.5645C>A                      | p.(Ser1882*)        |
| 2 | c.6841+1del                    | p.(Gly2281Glnfs*10) |
| 2 | c.6405_6409del                 | p.(Asn2135Lysfs*3)  |
| 2 | c.3386dup                      | p.(Phe1130Valfs*2)  |
| 2 | c.4889C>G                      | p.(Ser1630*)        |
| 2 | c.8995_8996del                 | p.(Leu2999Valfs*18) |
| 2 | c.5645C>A                      | p.(Ser1882*)        |
| 2 | c.9398C>G                      | p.(Ser3133*)        |
| 2 | c.9274del                      | p.(Tyr3092Ilefs*12) |
| 2 | c.3847_3848del                 | p.(Val1283Lysfs*2)  |
| 2 | c.5653dup                      | p.(Cys1885Leufs*15) |
| 2 | c.4648G>T                      | p.(Glu1550*)        |
| 2 | c.7506dup                      | p.(Val2503Argfs*36) |
| 2 | c.3847_3848del                 | p.(Val1283Lysfs*2)  |
| 2 | c.3812C>G                      | p.(Ser1271*)        |
| 2 | c.7234_7235insG                | p.(Thr2412Serfs*2)  |
| 2 | c.203_218del                   | p.(Lys68Serfs*7)    |
| 2 | c.2T>G                         | p.(Met1?)           |
| 2 | c.6444dup                      | p.(Ile2149Tyrfs*2)  |
| 2 | c.5645C>A                      | p.(Ser1882*)        |
| 2 | c.2808_2811del                 | p.(Ala938Profs*21)  |
| 2 | c.5645C>A                      | p.(Ser1882*)        |
|   |                                |                     |

**Supplementary Table S2: Patients characteristics in the triple-negative breast cancers (TNBC) cohort.** NA: not-available. \*\*\* Positive nodes if pre-chemotherapy biopsy positive or there was at least one yN or scar in the removed node after neoadjuvant chemotherapy.

| Variable                                                             | All<br>(n=270) | BRCA status               |                  |                   | p      |
|----------------------------------------------------------------------|----------------|---------------------------|------------------|-------------------|--------|
|                                                                      |                | Non-carriers<br>(n = 148) | BRCA1<br>(n=106) | BRCA2<br>(n = 16) |        |
| <b>Age, years, median<br/>(25<sup>th</sup>-75<sup>th</sup>) NA=0</b> | 41 (35-49)     | 41 (35-49)                | 39 (34-47)       | 45 (49-51)        | 0.066  |
| <b>cT (%)</b>                                                        |                |                           |                  |                   | 0.52   |
| <b>cT0</b>                                                           | 7 (3%)         | 2 (2%)                    | 4 (5%)           | 1 (9%)            |        |
| <b>cT1</b>                                                           | 69 (33%)       | 31 (29%)                  | 33 (38%)         | 4 (36%)           |        |
| <b>cT2</b>                                                           | 93 (45%)       | 51 (46%)                  | 38 (44%)         | 4 (36%)           |        |
| <b>cT3</b>                                                           | 30 (14%)       | 19 (17%)                  | 9 (10%)          | 2 (18%)           |        |
| <b>cT4</b>                                                           | 8 (4%)         | 6(5%)                     | 2 (2%)           | 0 (0%)            |        |
| <b>NA=63</b>                                                         |                |                           |                  |                   |        |
| <b>cN (%)</b>                                                        |                |                           |                  |                   | 0.42   |
| <b>cN0</b>                                                           | 145 (71%)      | 70 (65%)                  | 67 (79%)         | 8 (80%)           |        |
| <b>cN1</b>                                                           | 53 (26%)       | 34 (31%)                  | 17 (20%)         | 2 (20%)           |        |
| <b>cN2</b>                                                           | 3 (1%)         | 2 (2%)                    | 1 (1%)           | 0 (0%)            |        |
| <b>cN3</b>                                                           | 2 (1%)         | 2 (2%)                    | 0 (0%)           | 0 (0%)            |        |
| <b>NA=67</b>                                                         |                |                           |                  |                   |        |
| <b>Positive nodes ***<br/>NA= 11</b>                                 | 73 (28%)       | 44 (31%)                  | 26 (26%)         | 3 (19%)           | 0.57   |
| <b>Grade (%)</b>                                                     |                |                           |                  |                   | 0.50   |
| <b>1</b>                                                             | 3 (1%)         | 2 (1%)                    | 1 (1%)           | 0 (0%)            |        |
| <b>2</b>                                                             | 44 (16%)       | 29 (20%)                  | 12 (12%)         | 3 (19%)           |        |
| <b>3</b>                                                             | 220 (82%)      | 116 (79%)                 | 80 (88%)         | 13 (81%)          |        |
| <b>NA=3</b>                                                          |                |                           |                  |                   |        |
| <b>Mitotic index (%)</b>                                             |                |                           |                  |                   | 0.087  |
| <b>1</b>                                                             | 25 (10%)       | 20 (14%)                  | 4 (4%)           | 1 (8%)            |        |
| <b>2</b>                                                             | 52 (21%)       | 27 (19%)                  | 24 (26%)         | 1 (8%)            |        |
| <b>3</b>                                                             | 169 (69%)      | 93 (66%)                  | 66 (70%)         | 10 (83%)          |        |
| <b>NA=24</b>                                                         |                |                           |                  |                   |        |
| <b>Chemotherapy (%)</b>                                              |                |                           |                  |                   | 0.54   |
| <b>Neoadjuvant</b>                                                   | 89 (33%)       | 52 (35%)                  | 30 (28%)         | 7 (44%)           |        |
| <b>Adjuvant</b>                                                      | 179 (66%)      | 95 (64%)                  | 75 (71%)         | 9 (56%)           |        |
| <b>Both</b>                                                          | 2 (1%)         | 1 (1%)                    | 1 (1%)           | 0 (0%)            |        |
| <b>NA=0</b>                                                          |                |                           |                  |                   |        |
| <b>Anthracyclines (%)<br/>NA=2</b>                                   | 237 (88%)      | 129 (88%)                 | 96 (91%)         | 12 (75%)          | 0.13   |
| <b>Taxanes (%) NA=2</b>                                              | 220 (82%)      | 130 (88%)                 | 78 (74%)         | 12 (75%)          | 0.0088 |
| <b>Alkylating agent (%)<br/>NA=2</b>                                 | 264 (99%)      | 145 (99%)                 | 103 (98%)        | 16 (100%)         | 1      |
| <b>Platinum (%) NA=2</b>                                             | 3 (1%)         | 0 (0%)                    | 2 (2%)           | 1 (6%)            | 0.037  |



**Supplementary Table S3: Patients characteristics in the non-TNBC cohort.**

| Variable                                                         | All<br>(n=588)                                           | BRCA status                                              |                                                     |                                                     | p       |
|------------------------------------------------------------------|----------------------------------------------------------|----------------------------------------------------------|-----------------------------------------------------|-----------------------------------------------------|---------|
|                                                                  |                                                          | Non-carriers<br>(n = 472)                                | BRCA1<br>(n=49)                                     | BRCA2<br>(n = 67)                                   |         |
| Age, years, median<br>(25 <sup>th</sup> -75 <sup>th</sup> ) NA=0 | 39 (34-47)                                               | 39 (34-47)                                               | 45 (37-50)                                          | 39 (34-46)                                          | 0.014   |
| cT (%)<br>cT0<br>cT1<br>cT2<br>cT3<br>cT4<br>NA=133              | 36 (8%)<br>167 (37%)<br>181 (40%)<br>53 (12%)<br>19 (4%) | 32 (9%)<br>131 (36%)<br>147 (40%)<br>43 (12%)<br>13 (4%) | 2 (6%)<br>19 (49%)<br>12 (31%)<br>4 (10%)<br>2 (5%) | 2 (4%)<br>17 (33%)<br>22 (43%)<br>6 (12%)<br>4 (8%) | 0.58    |
| cN (%)<br>cN0<br>cN1<br>cN2<br>cN3<br>NA=135                     | 298 (66%)<br>145 (32%)<br>5 (1%)<br>6 (1%)               | 237 (65%)<br>119 (33%)<br>4 (1%)<br>4 (1%)               | 28 (72%)<br>11 (28%)<br>0 (0%)<br>0 (0%)            | 33 (65%)<br>15 (29%)<br>1 (2%)<br>2 (4%)            | 0.59    |
| Positive nodes*** NA=10                                          | 322 (56%)                                                | 251 (54%)                                                | 29 (60%)                                            | 42 (64%)                                            | 0.28    |
| Grade (%)<br>1<br>2<br>3<br>NA=14                                | 37 (6%)<br>275 (48%)<br>262 (46%)                        | 34 (7%)<br>226 (49%)<br>204 (44%)                        | 0 (0%)<br>17 (36%)<br>30 (64%)                      | 3 (5%)<br>32 (51%)<br>28 (44%)                      | 0.056   |
| Mitotic index (%)<br>1<br>2<br>3<br>NA=63                        | 183 (35%)<br>179 (34%)<br>164 (31%)                      | 155 (36%)<br>145 (34%)<br>125 (29%)                      | 7 (17%)<br>14 (33%)<br>21 (50%)                     | 21 (36%)<br>20 (34%)<br>17 (29%)                    | 0.047   |
| Positive ER (%) NA=0                                             | 516 (88%)                                                | 417 (88%)                                                | 36 (73%)                                            | 63 (94%)                                            | 0.0053  |
| Positive PR (%) NA=0                                             | 449 (76%)                                                | 360 (76%)                                                | 34 (69%)                                            | 55 (82%)                                            | 0.29    |
| Positive HER-2 (%)<br>NA=0                                       | 173 (29%)                                                | 153 (32%)                                                | 7 (14%)                                             | 13 (19%)                                            | 0.0040  |
| Chemotherapy (%)<br>Neoadjuvant<br>Adjuvant<br>Both<br>NA=0      | 154 (26%)<br>428 (73%)<br>6 (1%)                         | 125 (26%)<br>341 (72%)<br>6 (1%)                         | 9 (18%)<br>40 (82%)<br>0 (0%)                       | 20 (30%)<br>47 (70%)<br>0 (0%)                      | 0.60    |
| Anthracyclines (%)<br>NA=1                                       | 457 (78%)                                                | 368 (78%)                                                | 33 (67%)                                            | 56 (85%)                                            | 0.083   |
| Taxanes (%) NA=1                                                 | 483 (82%)                                                | 389 (82%)                                                | 39 (80%)                                            | 55 (83%)                                            | 0.82    |
| Alkylating agent (%)<br>NA=2                                     | 547 (93%)                                                | 439 (93%)                                                | 44 (90%)                                            | 64 (97%)                                            | 0.29    |
| Platinum (%) NA=1                                                | 27 (5%)                                                  | 23 (5%)                                                  | 3 (6%)                                              | 1 (1%)                                              | 0.35    |
| Trastuzumab (%) NA=1                                             | 142 (24%)                                                | 130 (28%)                                                | 3 (6%)                                              | 9 (14%)                                             | 0.00014 |

**Supplementary Table S4: Landmark analysis at one year of the impact of *BRCA* status on DFS and DSS in the TNBC cohort**

| Cox proportional hazards regression for disease-free-survival     |           |                     |          |
|-------------------------------------------------------------------|-----------|---------------------|----------|
|                                                                   |           | Unadjusted analysis |          |
|                                                                   | N         | HR (95%CI)          | <i>p</i> |
| Non-carriers                                                      | 148 (55%) | 1                   | 0.010    |
| <i>BRCA1</i>                                                      | 106 (39%) | 0.48 (0.28-0.83)    |          |
| <i>BRCA2</i>                                                      | 16 (6%)   | 0.34 (0.10-1.16)    |          |
| Cox proportional hazards regression for disease-specific survival |           |                     |          |
|                                                                   |           | Unadjusted analysis |          |
|                                                                   | N         | HR (95%CI)          | <i>p</i> |
| Non-carriers                                                      | 148 (55%) | 1                   | 0.032    |
| <i>BRCA1</i>                                                      | 106 (39%) | 0.46 (0.24-0.87)    |          |
| <i>BRCA2</i>                                                      | 16 (6%)   | 0.40 (0.10-1.7)     |          |

**Supplementary Table S5: Multivariate analysis of DFS and DSS in the subgroup of patients with non-TNBC.** NI: not included

| Cox proportional hazards regression |           |                              |                 |       |                   |    |                              |                 |        |                   |        |
|-------------------------------------|-----------|------------------------------|-----------------|-------|-------------------|----|------------------------------|-----------------|--------|-------------------|--------|
|                                     |           | Disease-free survival        |                 |       |                   |    | Disease-specific survival    |                 |        |                   |        |
|                                     |           | Unadjusted analysis          |                 |       | Adjusted Analysis |    | Unadjusted analysis          |                 |        | Adjusted Analysis |        |
|                                     | N         | 5-years DFS rate<br>(95% CI) | HR (95%CI)      | p     | HR (95%CI)        | p  | 5-years DSS rate<br>(95% CI) | HR (95%CI)      | p      | HR (95%CI)        | p      |
| <b>Non-carriers</b>                 | 472 (81%) | 92 (90-95)                   | 1               |       |                   |    | 97 (95-99)                   | 1               |        | 1                 |        |
| <b>BRCA1</b>                        | 49 (8%)   | 91 (82-100)                  | 0.91 (0.50-1.7) | 0.88  | NI                | NI | 97 (92-100)                  | 0.86 (0.37-2.0) | 0.93   | 0.90 (0.39-2.1)   | 0.89   |
| <b>BRCA2</b>                        | 67 (11%)  | 87 (78-96)                   | 1.1 (0.70-1.9)  |       |                   |    | 98 (95-100)                  | 1.0 (0.51-2.1)  |        | 0.97 (0.48-2.0)   |        |
| <b>Grade</b>                        |           |                              |                 |       |                   |    |                              |                 |        |                   |        |
| <b>1</b>                            | 37 (6%)   | 97 (92-100)                  | 1               |       |                   |    | 94 (92-96)                   | 1               | 0.68   | NI                | NI     |
| <b>2</b>                            | 275 (48%) | 92 (89-96)                   | 1.4 (0.70-2.8)  | 0.60  | NI                | NI | 93 (86-100)                  | 1.5 (0.53-4.2)  |        |                   |        |
| <b>3</b>                            | 262 (46%) | 90 (86-94)                   | 1.4 (0.68-2.8)  |       |                   |    | 91 (85-99)                   | 1.4 (0.48-3.8)  |        |                   |        |
| <b>Age</b>                          |           |                              |                 |       |                   |    |                              |                 |        |                   |        |
| <b>&gt;35</b>                       | 413 (70%) | 93 (90-96)                   | 1               | 0.086 | NI                | NI | 95 (92-97)                   | 1               | 0.030  | 1                 | 0.032  |
| <b>≤35</b>                          | 175 (30%) | 88 (83-94)                   | 1.4 (1.0-1.9)   |       |                   |    | 91 (87-96)                   | 1.7 (1.1-2.6)   |        | 1.7 (1.0-2.6)     |        |
| <b>Nodal status</b>                 |           |                              |                 |       |                   |    |                              |                 |        |                   |        |
| <b>Negative</b>                     | 256 (44%) | 94 (90-97)                   | 1               | 0.082 | NI                | NI | 96 (94-99)                   | 1               | 0.0018 | 1                 | 0.0015 |
| <b>Positive</b>                     | 322 (56%) | 90 (86-93)                   | 1.4 (0.96-1.9)  |       |                   |    | 92 (89-95)                   | 2.3 (1.3-3.8)   |        | 2.3 (1.4-3.9)     |        |

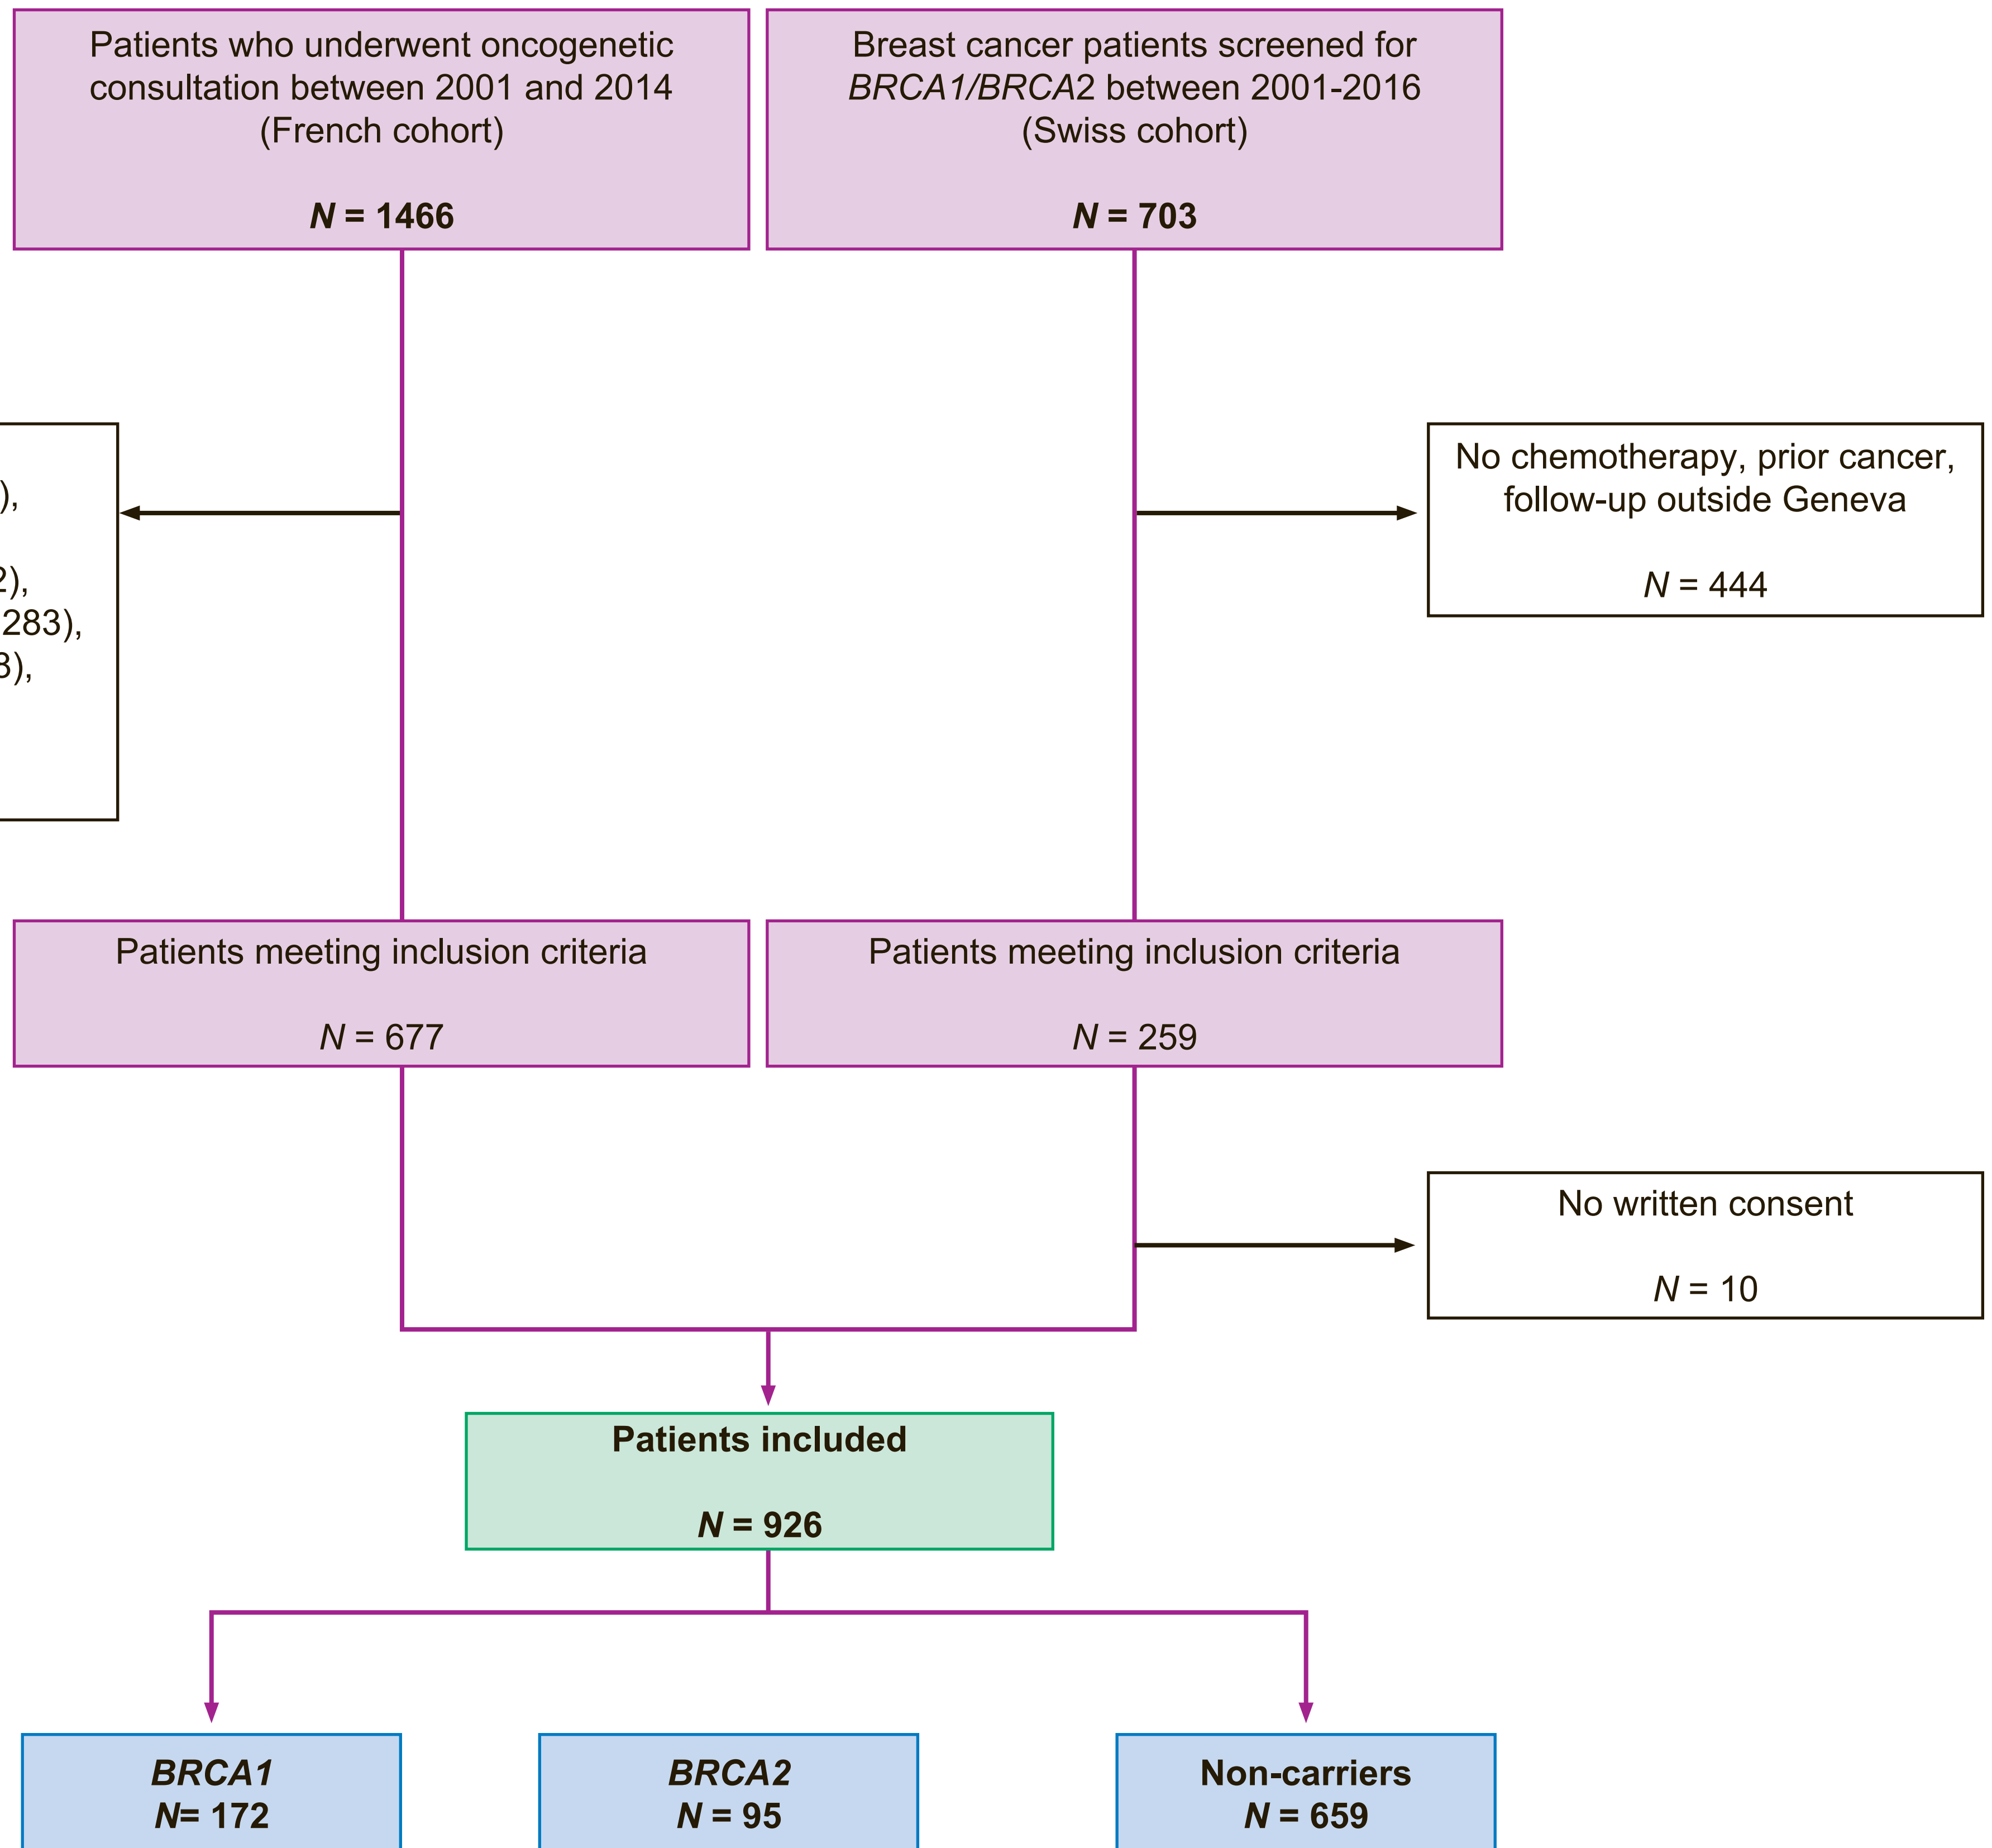

Supplement: 41598_2020_63759_MOESM1_ESM.pdf [file 41598_2020_63759_MOESM1_ESM.pdf]
